# Supplementary material for: Direct amide bond formation from carboxylic acids and amines using activated alumina balls as a new, convenient, clean, reusable and low cost heterogeneous catalyst
Source: Royal Society of Chemistry journal article supplement (doi:10.1039/c2gc35880h), 2012-01-01

# **Direct amide bond formation from carboxylic acids and amines using activated alumina balls as a new, convenient, clean, reusable and low cost heterogeneous catalyst**

Sabari Ghosh, Asim Bhaumik, John Mondal, Amit Mallik, Sumita Sengupta (Bandyopadhyay) and Chhanda Mukhopadhyay\*

Supplementary Information  
Part 2

*Copy of all NMR spectra*

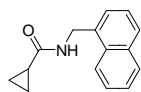

Compound **3ab**

$^1\text{H}$  NMR and  $^{13}\text{C}$  NMR ( $\text{DMSO-}d_6$ )

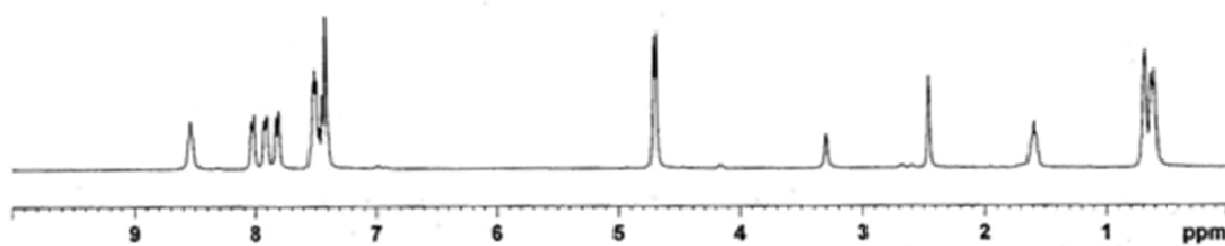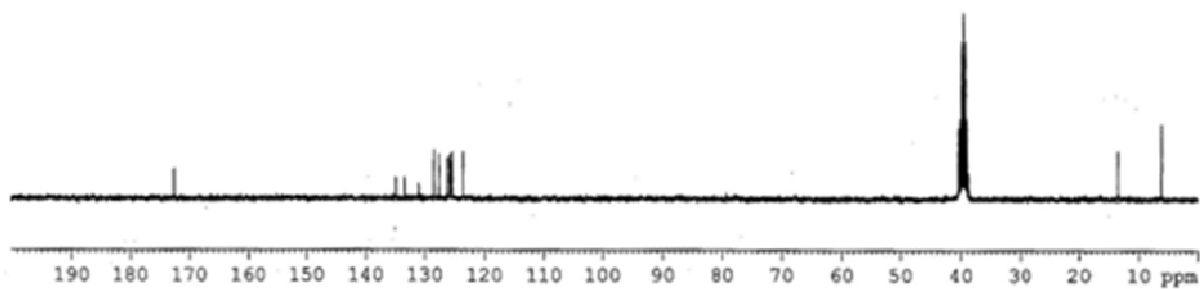

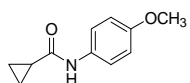

Compound **3ac**

$^1\text{H}$  NMR and  $^{13}\text{C}$  NMR ( $\text{CDCl}_3$ )

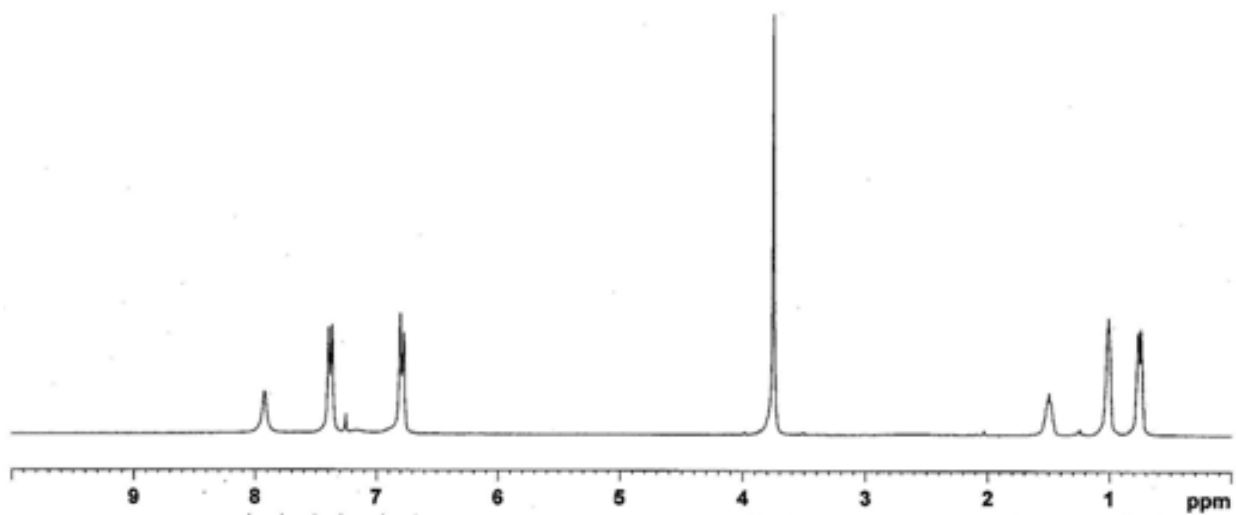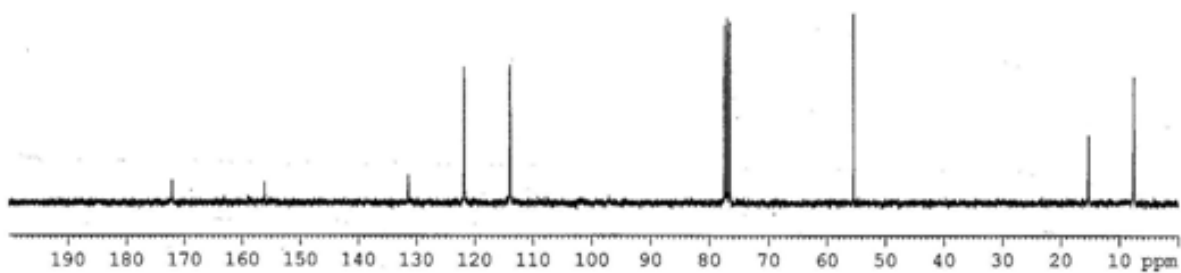

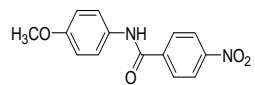

Compound **3dc**  
 $^1\text{H}$  NMR and  $^{13}\text{C}$  NMR ( $\text{CDCl}_3$ )

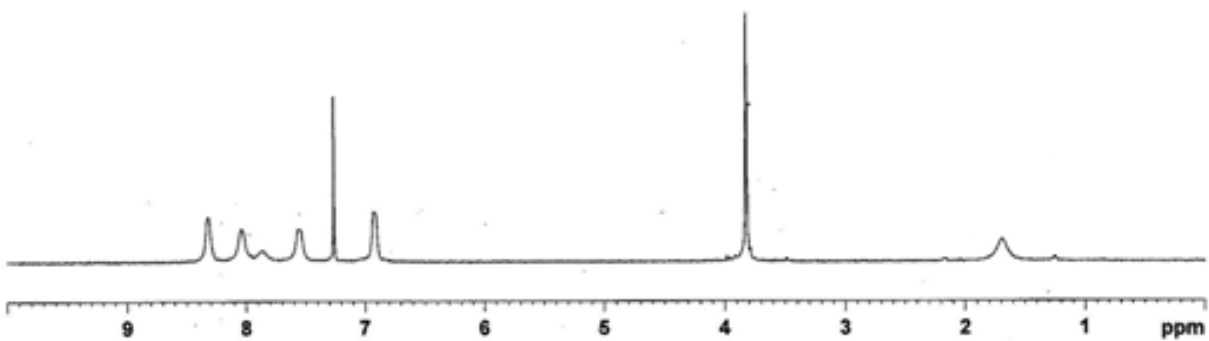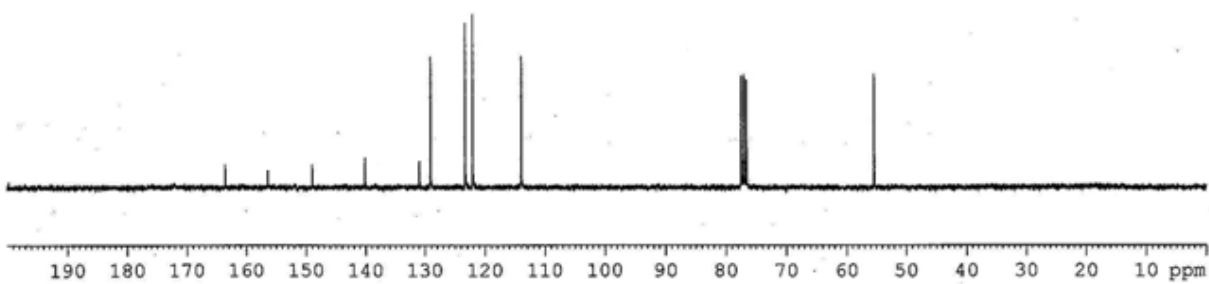

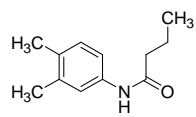

Compound **3ef**

$^1\text{H}$  NMR and  $^{13}\text{C}$  NMR ( $\text{CDCl}_3$ )

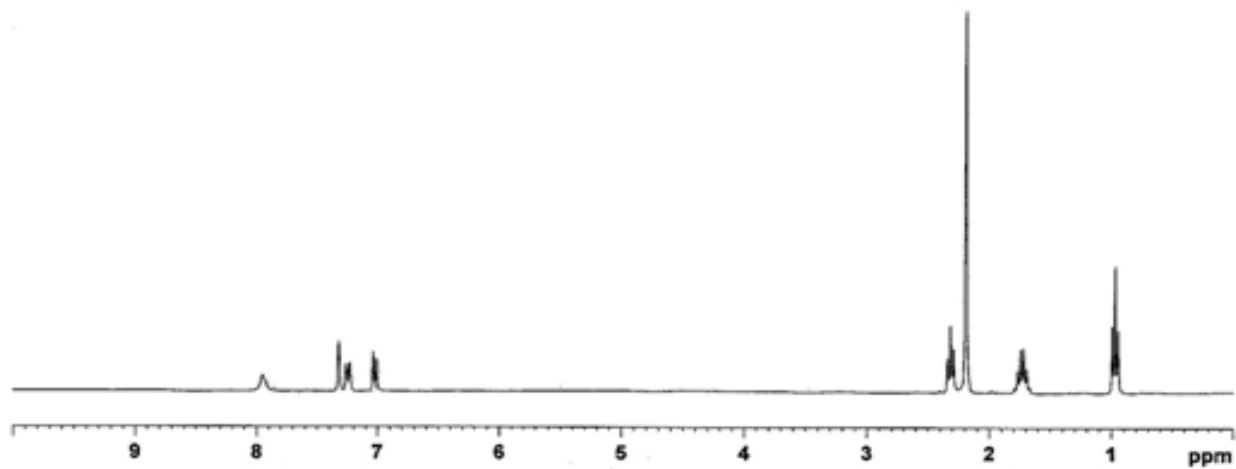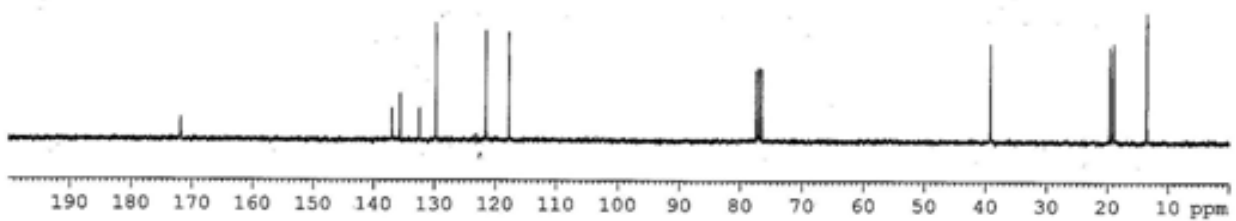

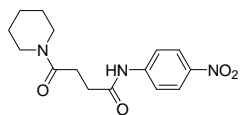

Compound **3gh**

$^1\text{H}$  NMR and  $^{13}\text{C}$  NMR ( $\text{CDCl}_3$ )

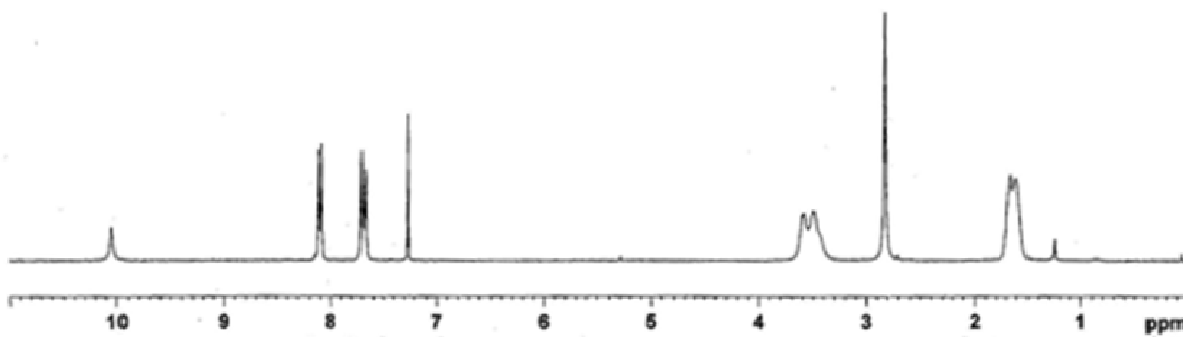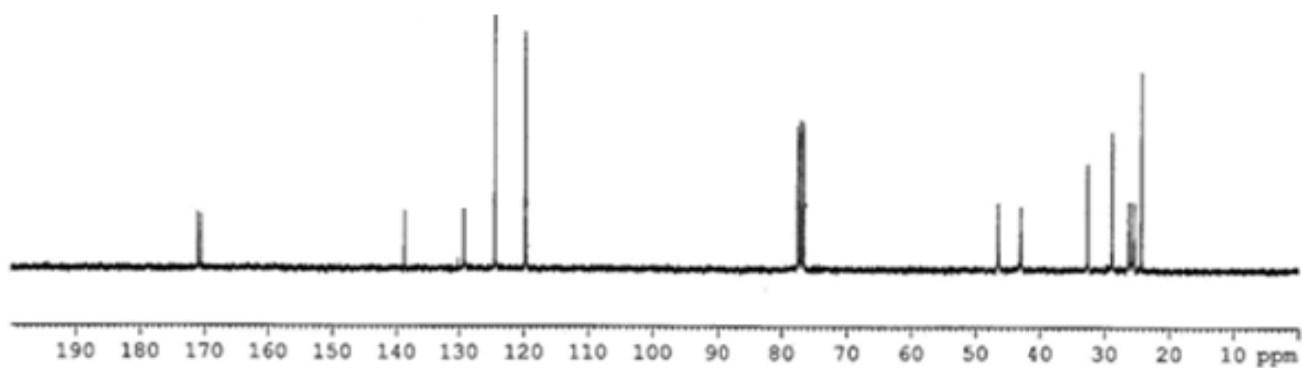

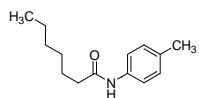

Compound **3ij**

$^1\text{H}$  NMR and  $^{13}\text{C}$  NMR ( $\text{CDCl}_3$ )

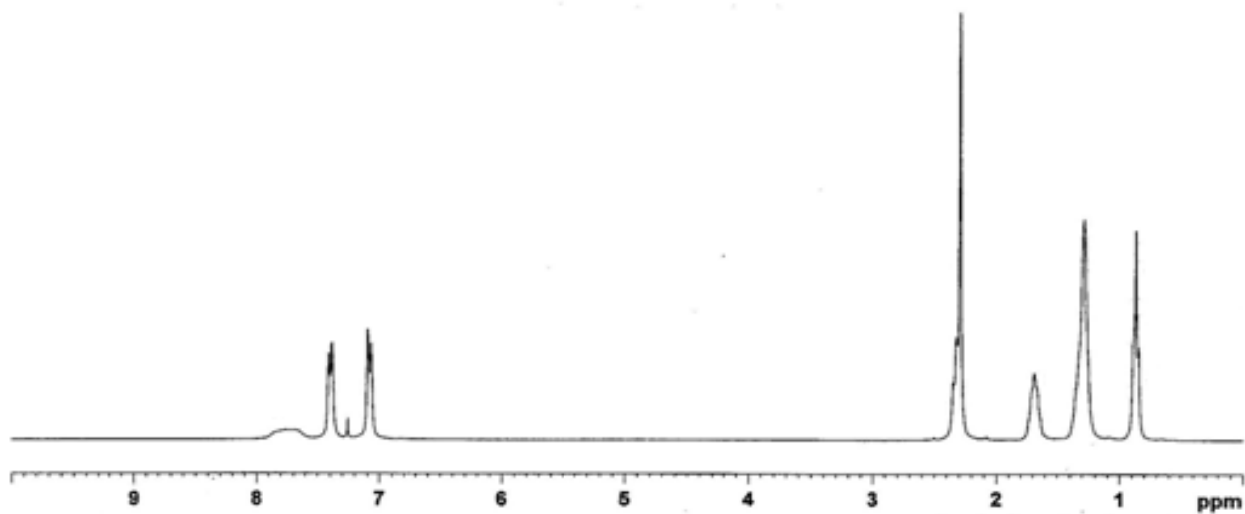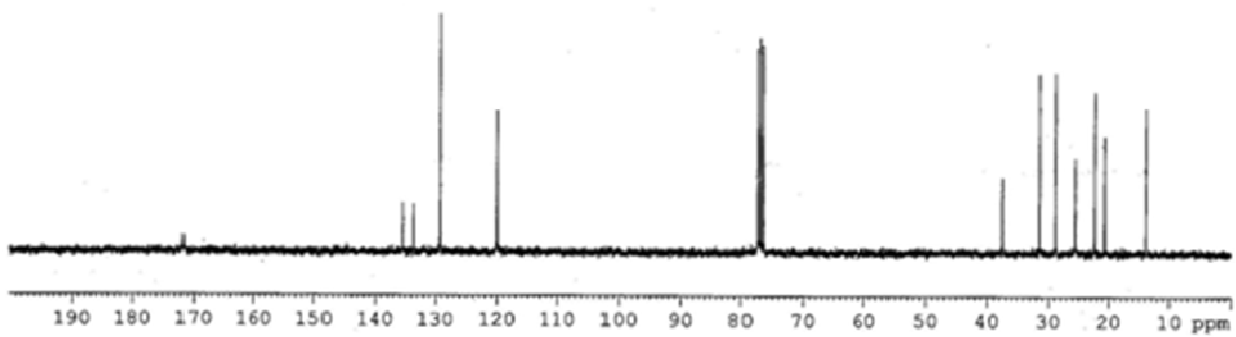

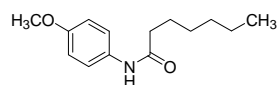

Compound 3ic  
<sup>1</sup>H NMR and <sup>13</sup>C NMR (CDCl<sub>3</sub>)

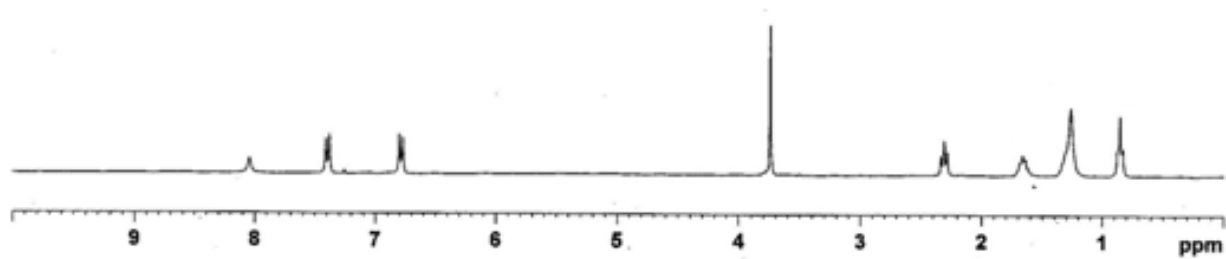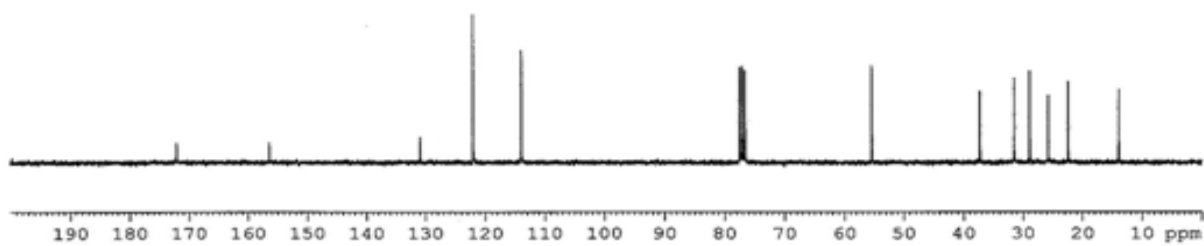



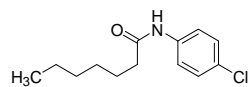

Compound **3ik**

$^1\text{H}$  NMR and  $^{13}\text{C}$  NMR ( $\text{CDCl}_3$ )

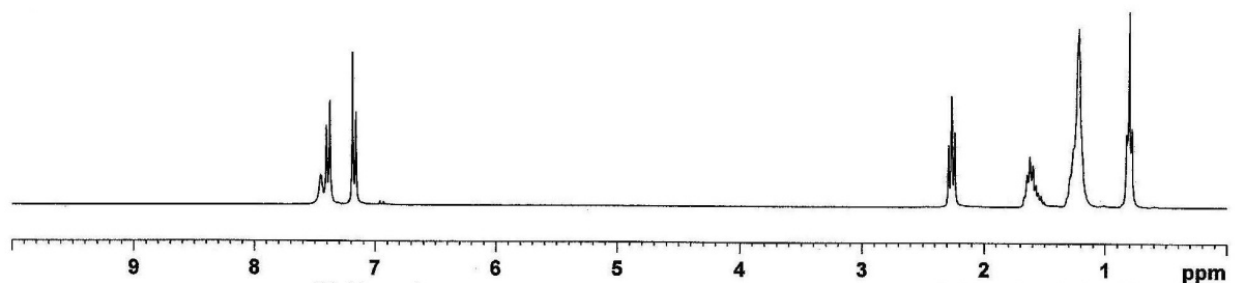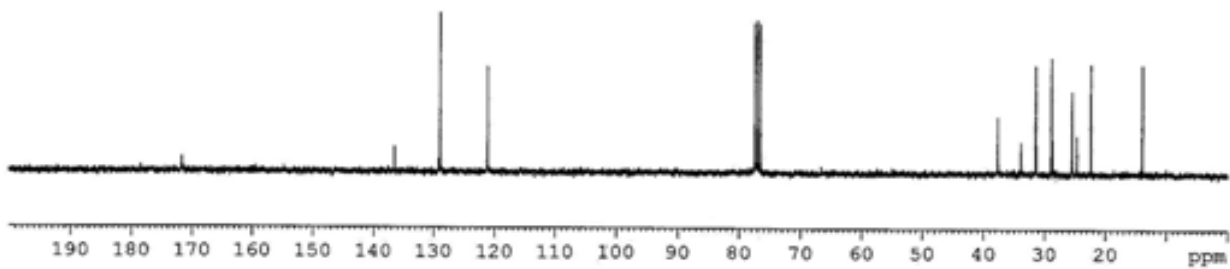

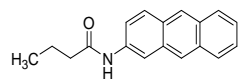

Compound **3el**

$^1\text{H}$  NMR and  $^{13}\text{C}$  NMR ( $\text{DMSO-}d_6$ )

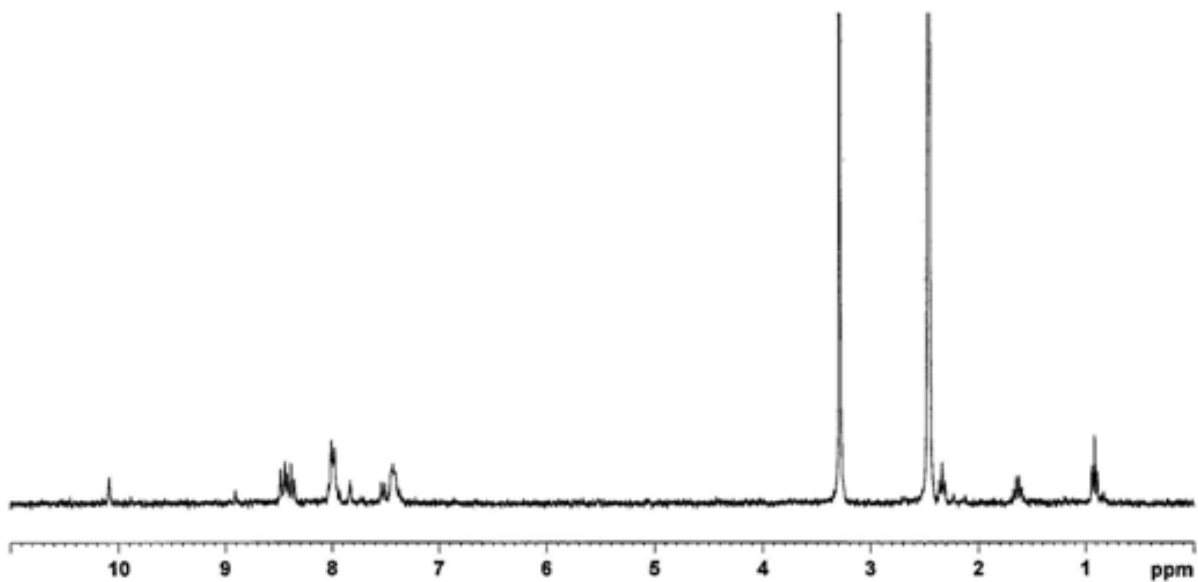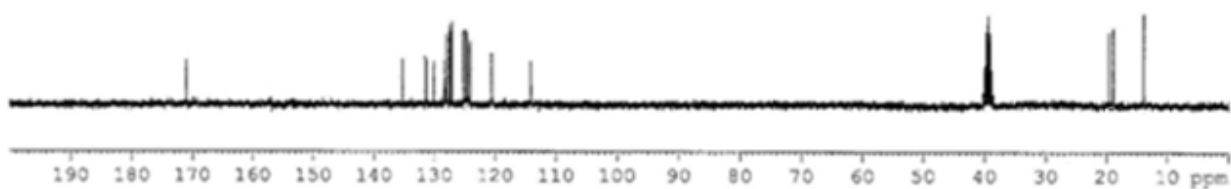

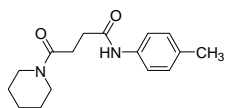

Compound **3gj**

$^1\text{H}$  NMR and  $^{13}\text{C}$  NMR ( $\text{CDCl}_3$ )

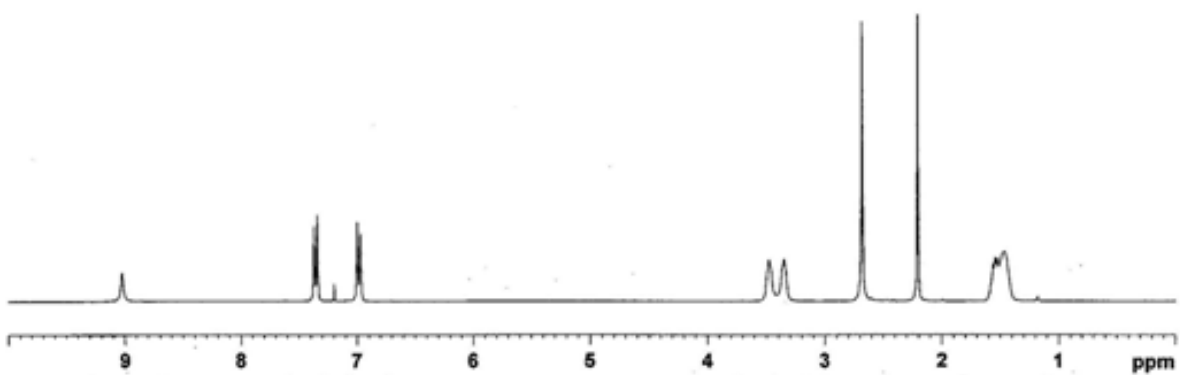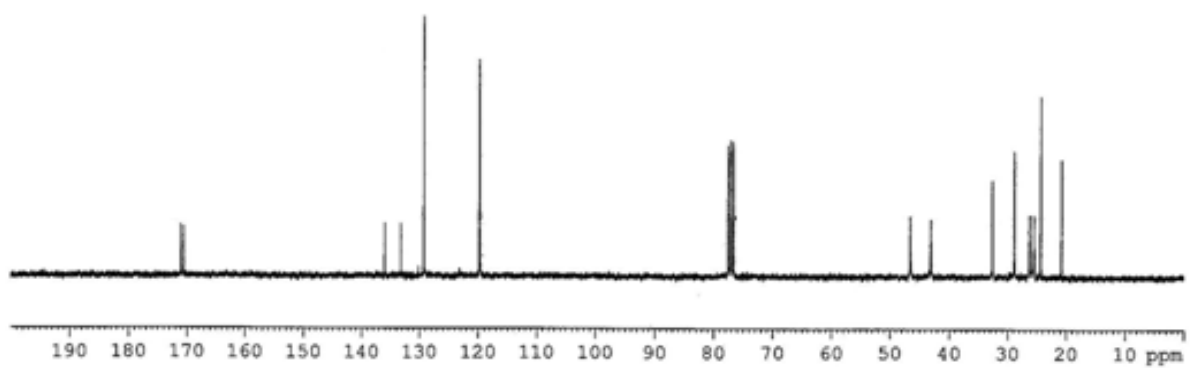

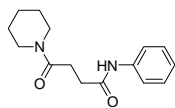

Compound **3gm**

$^1\text{H}$  NMR and  $^{13}\text{C}$  NMR ( $\text{CDCl}_3$ )

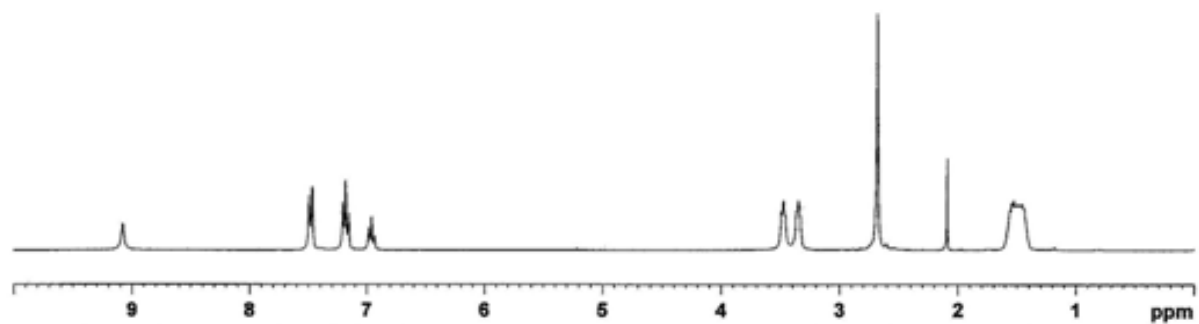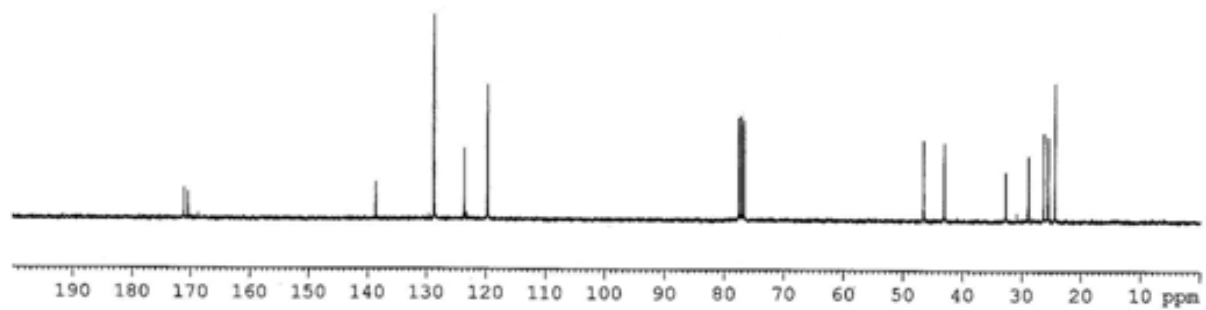

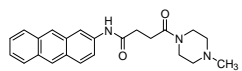

Compound **3nl**

$^1\text{H}$  NMR and  $^{13}\text{C}$  NMR ( $\text{DMSO-}d_6$ )

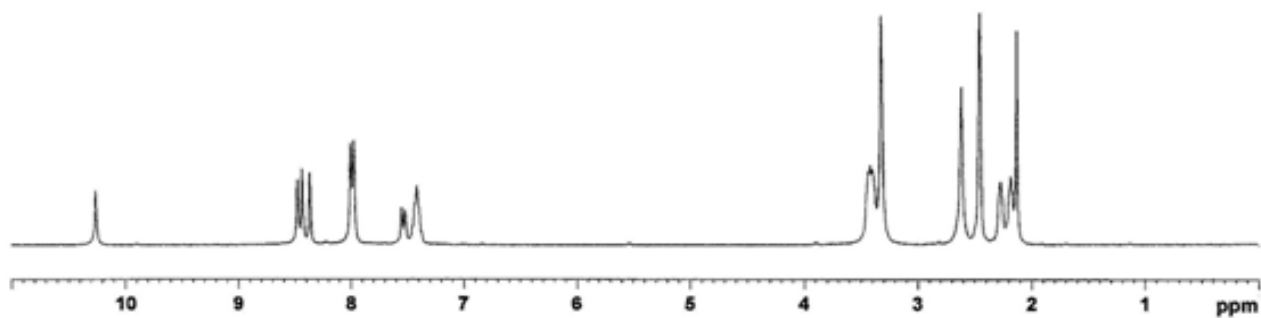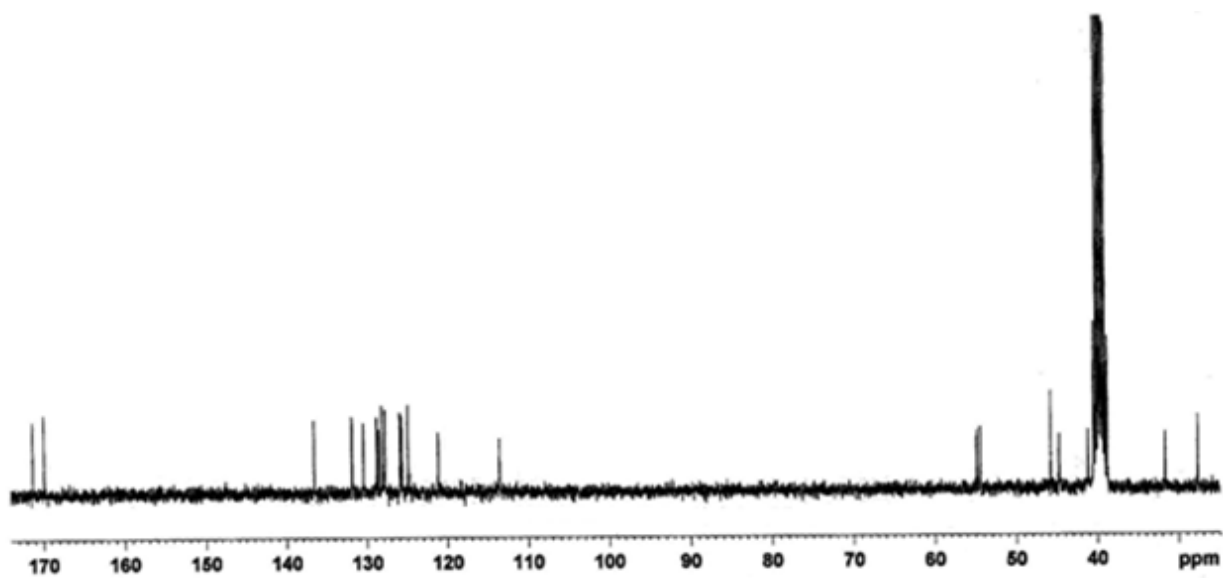

COSY (Compound **3nl**)

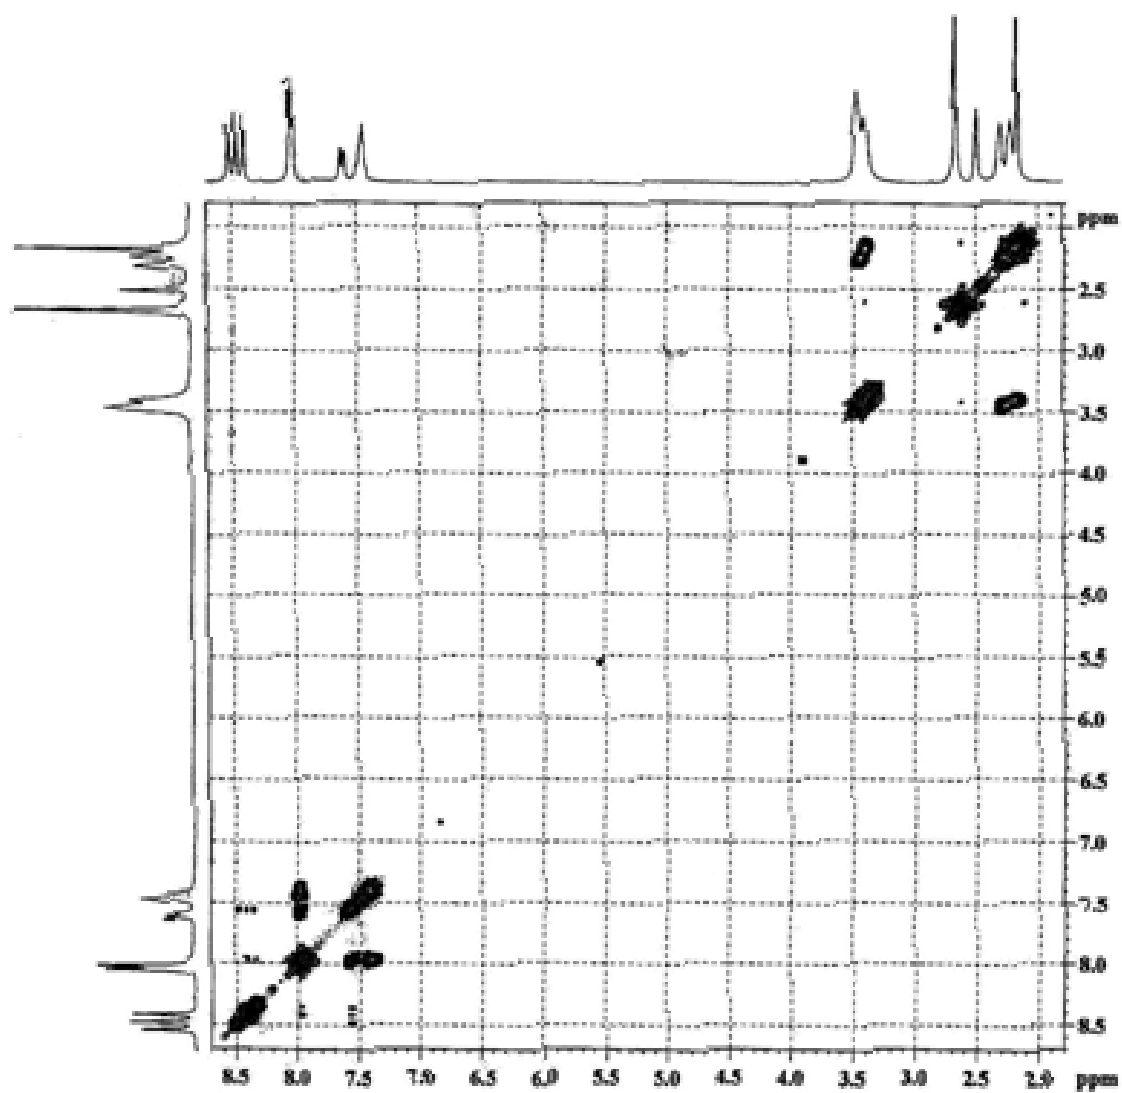

HSQC (Compound **3nl**)

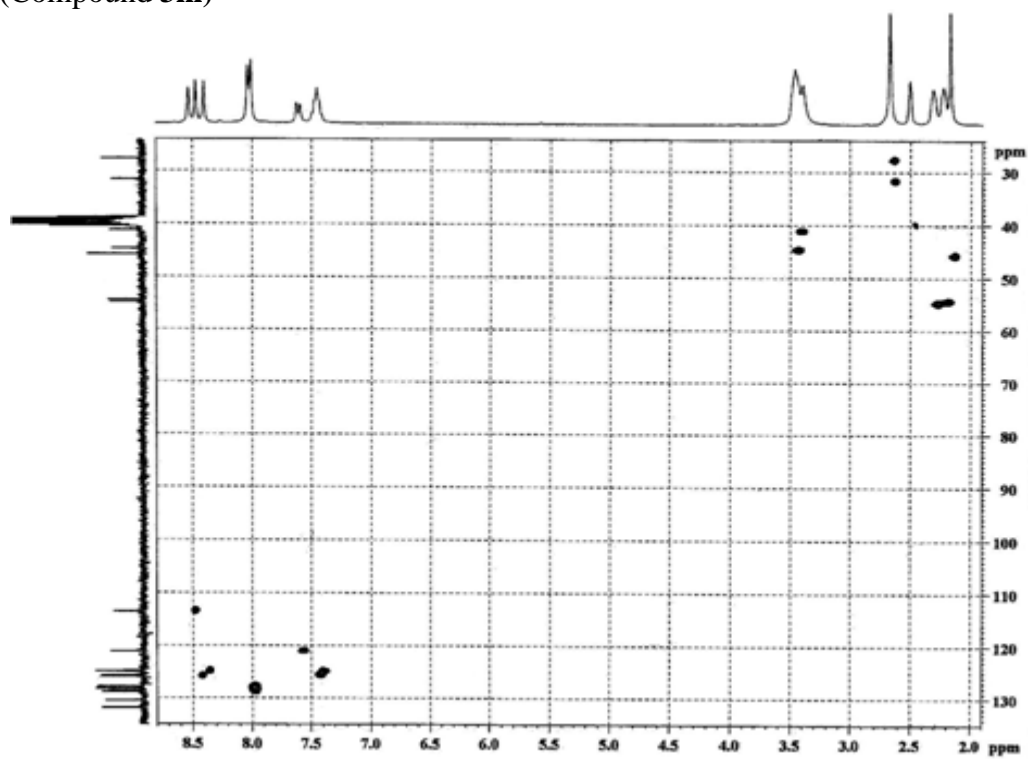

HMBC (Compound **3nl**)

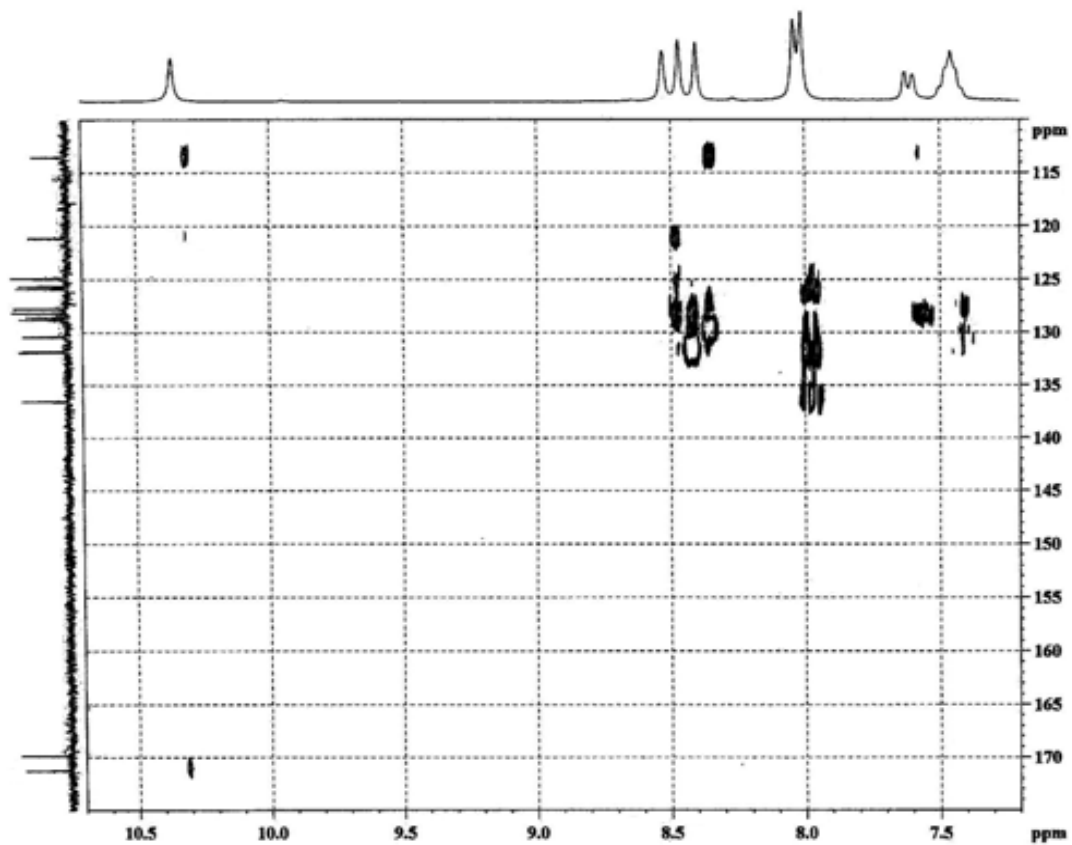

NOESY (Compound **3nl**)

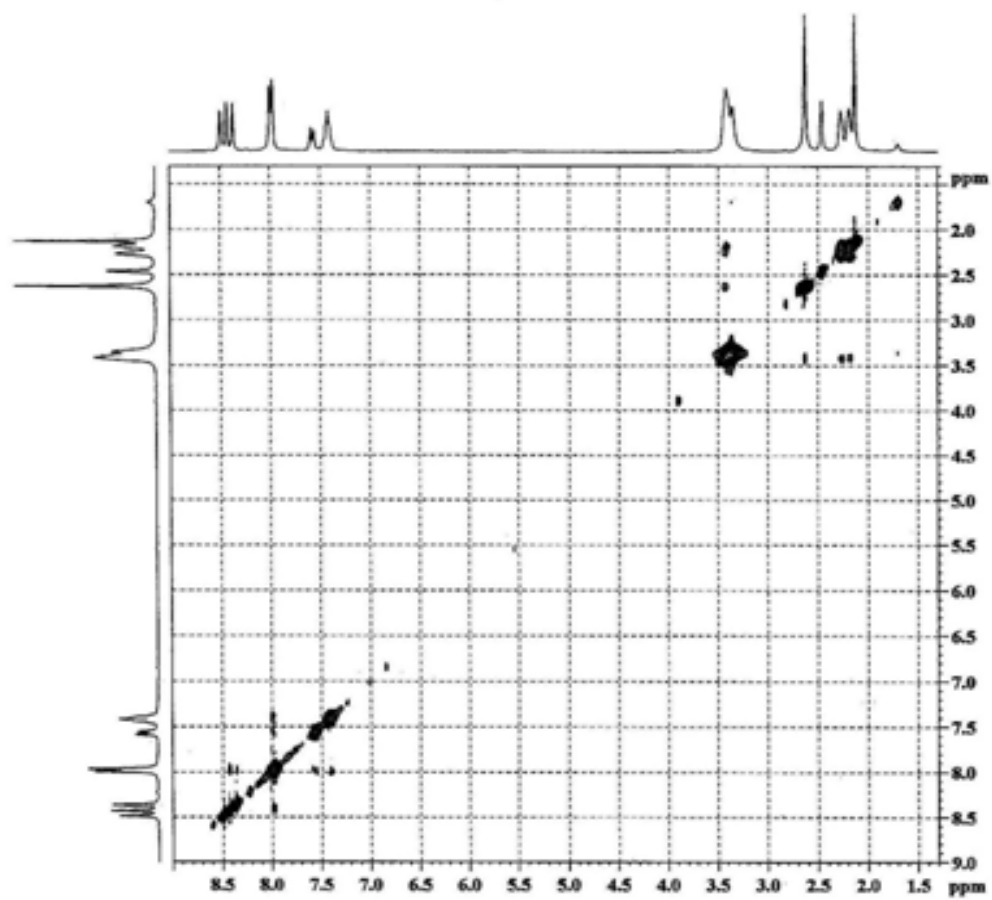



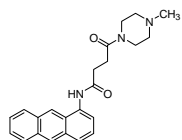

Compound **3no**

$^1\text{H}$  NMR and  $^{13}\text{C}$  NMR (DMSO- $d_6$ )

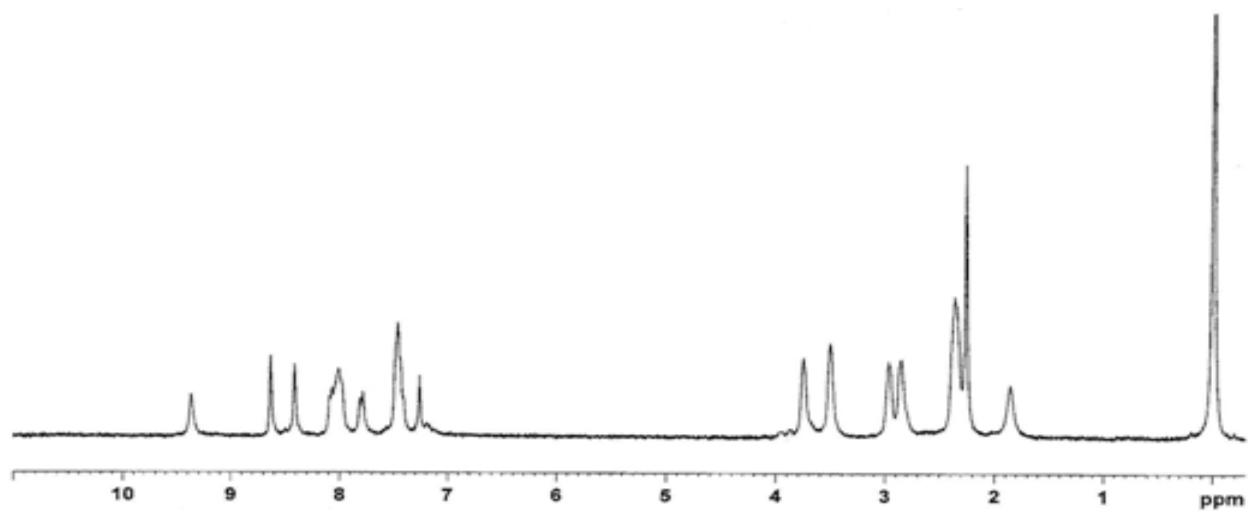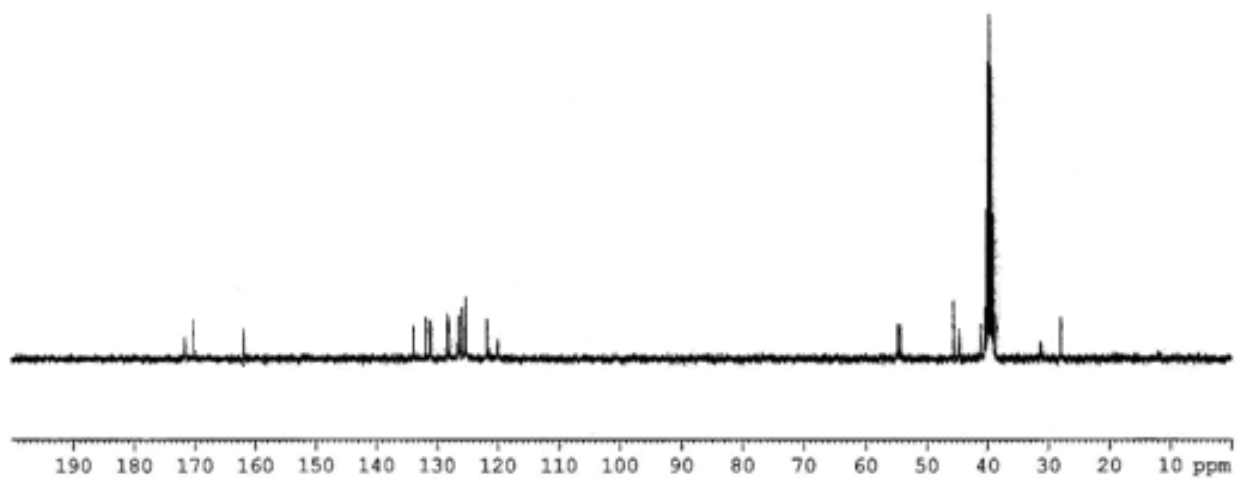

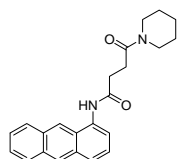

Compound **3go**  
 $^1\text{H}$  NMR and  $^{13}\text{C}$  NMR (DMSO- $d_6$ )

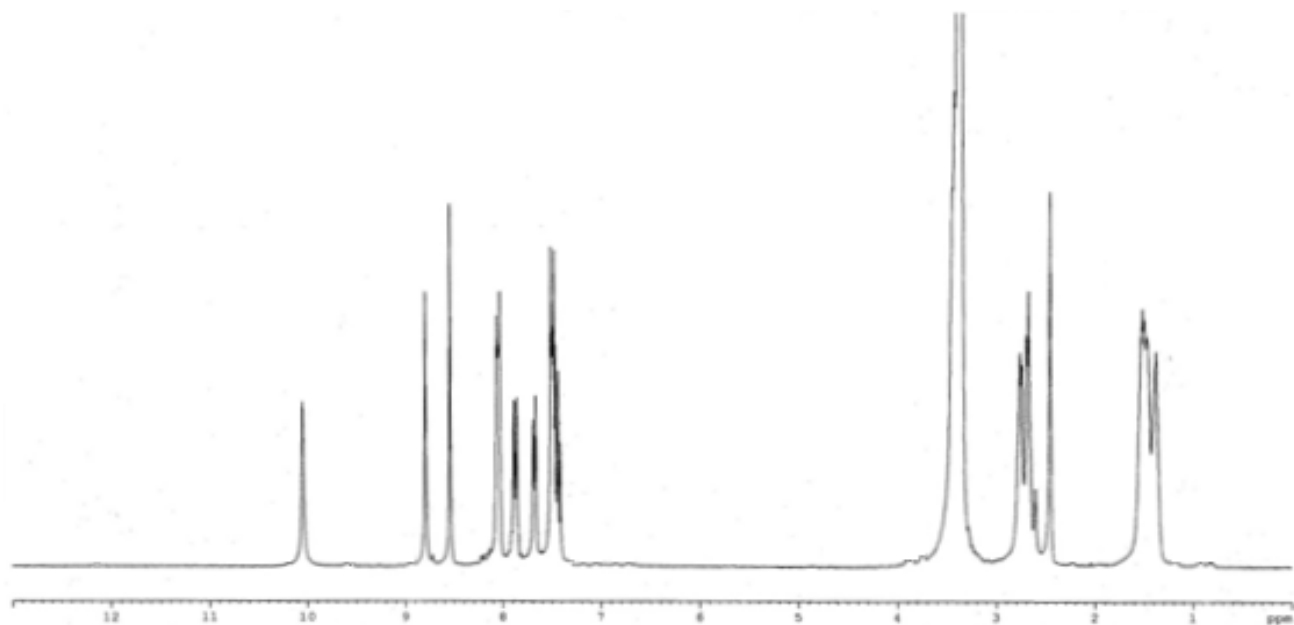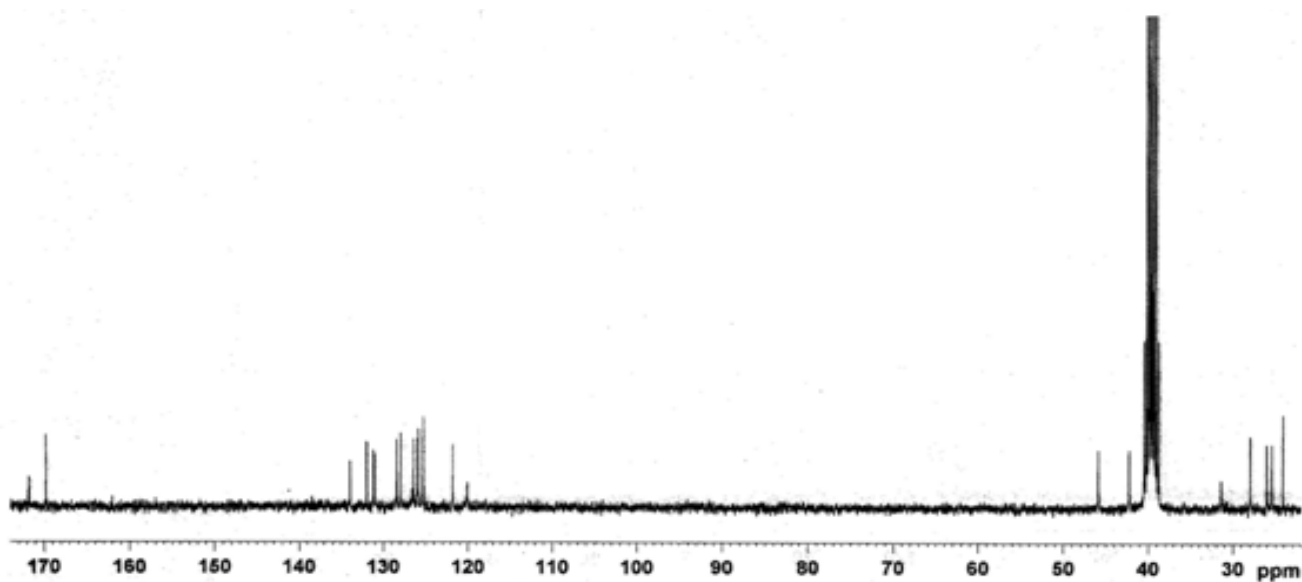

COSY (Compound **3go**)

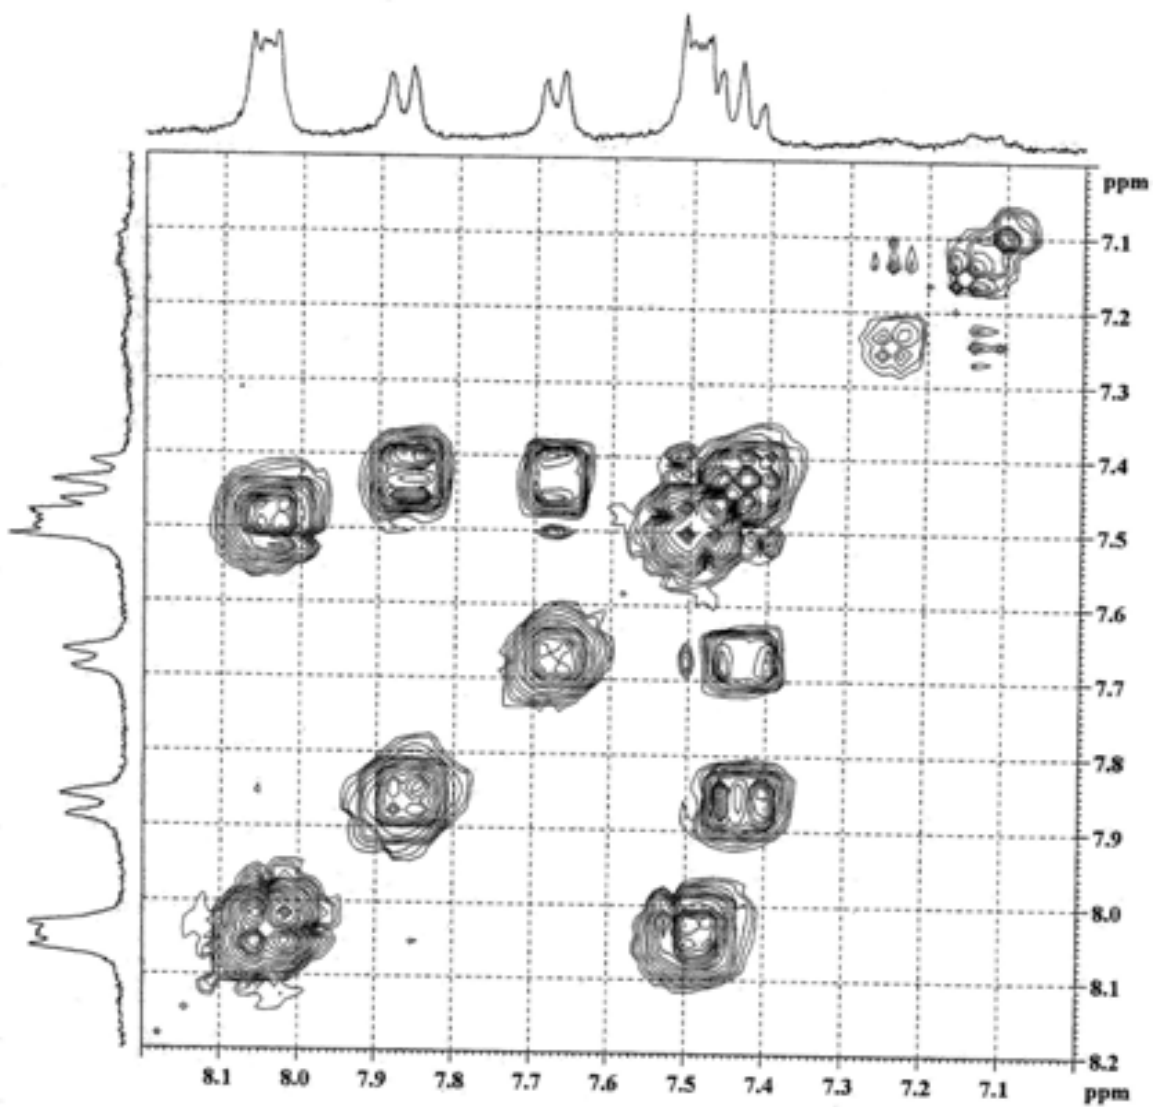

HSQC (Compound **3go**)

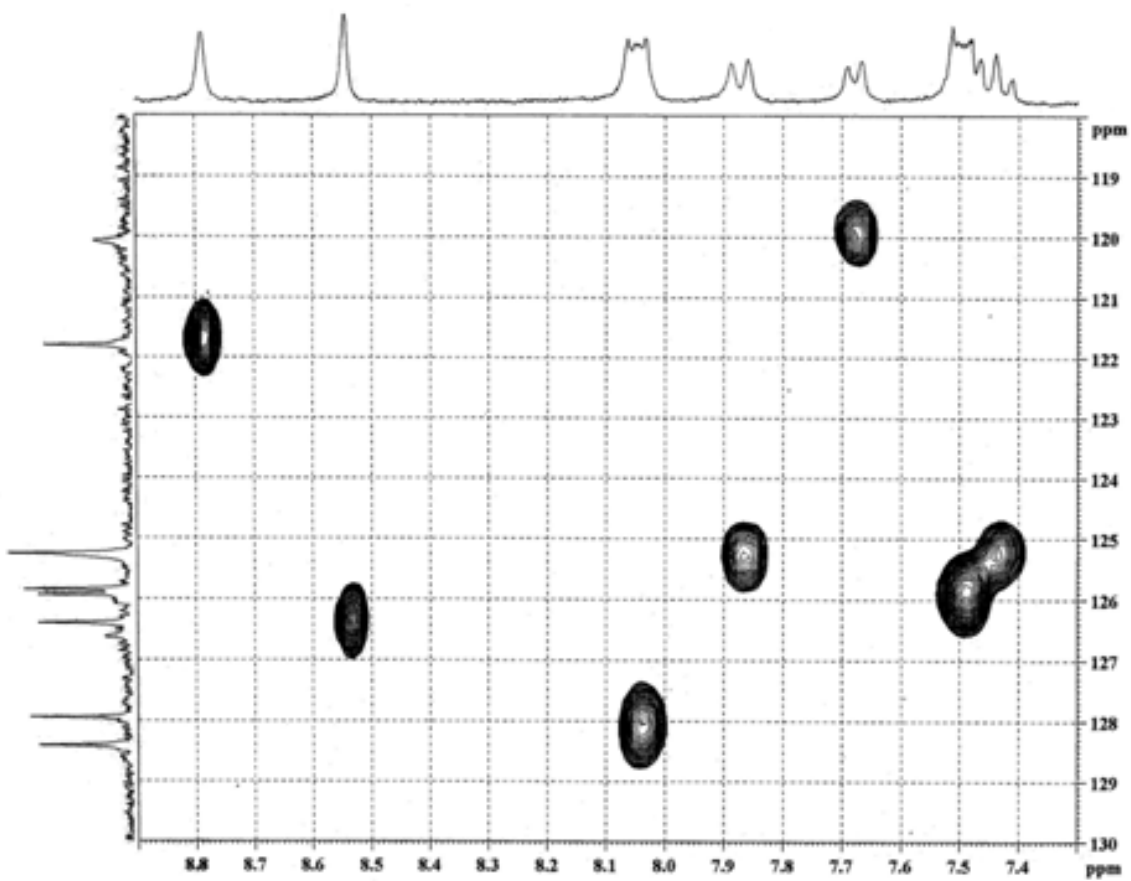

### HMBC (Compound 3go)

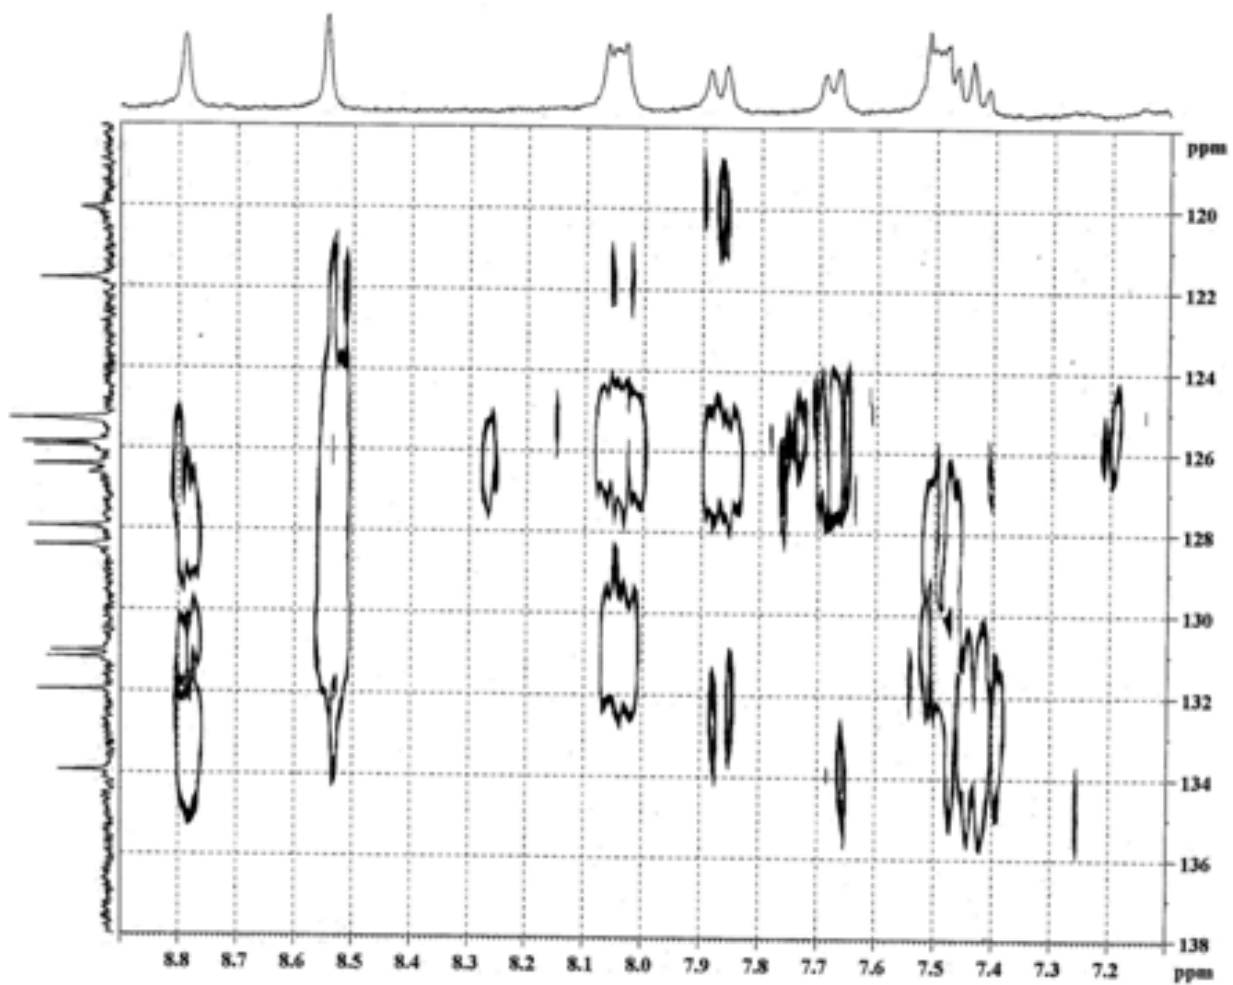

NOESY (Compound **3go**)

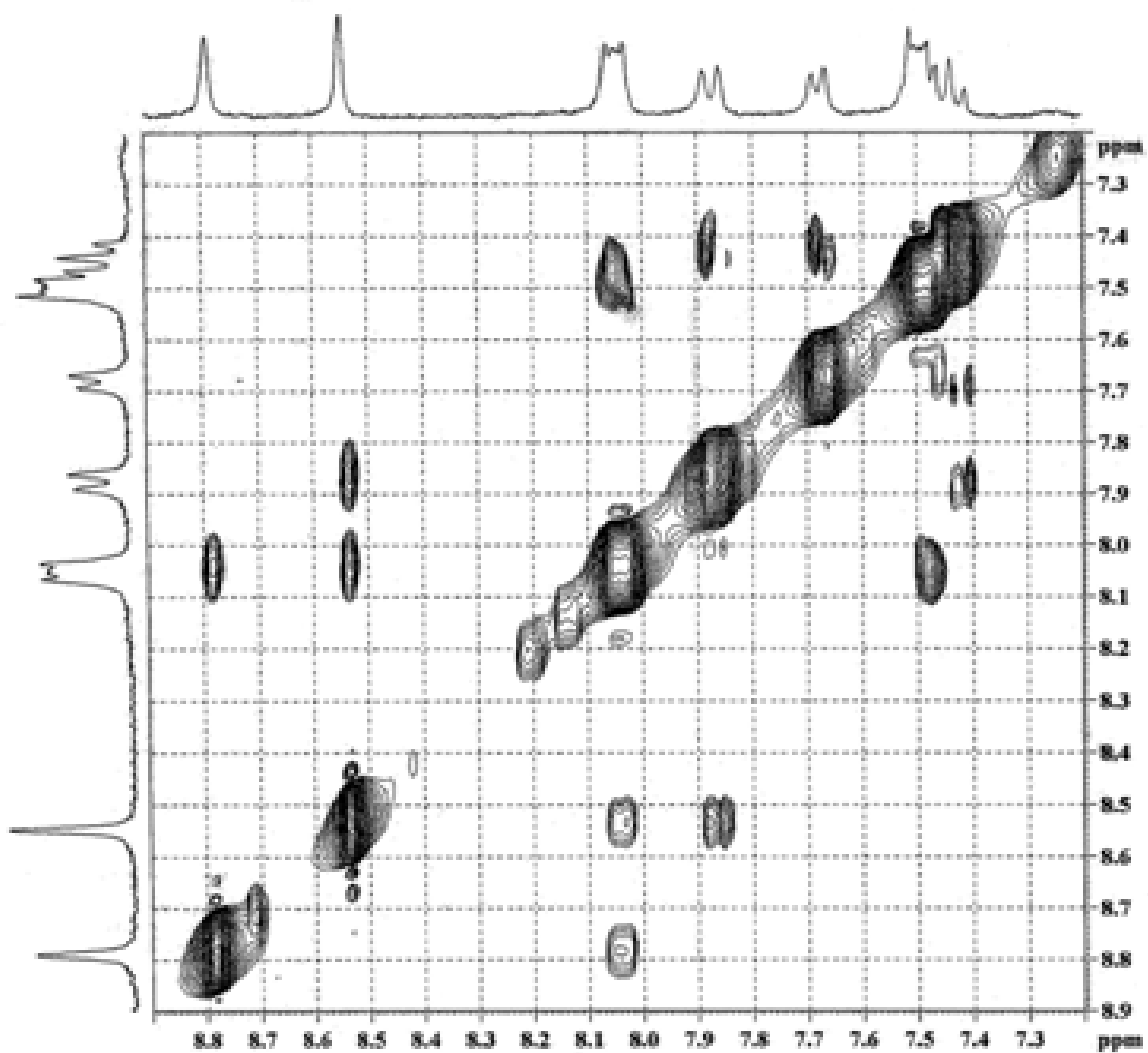

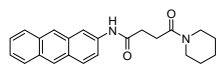

Compound **3no**

$^1\text{H}$  NMR and  $^{13}\text{C}$  NMR (DMSO- $d_6$ )

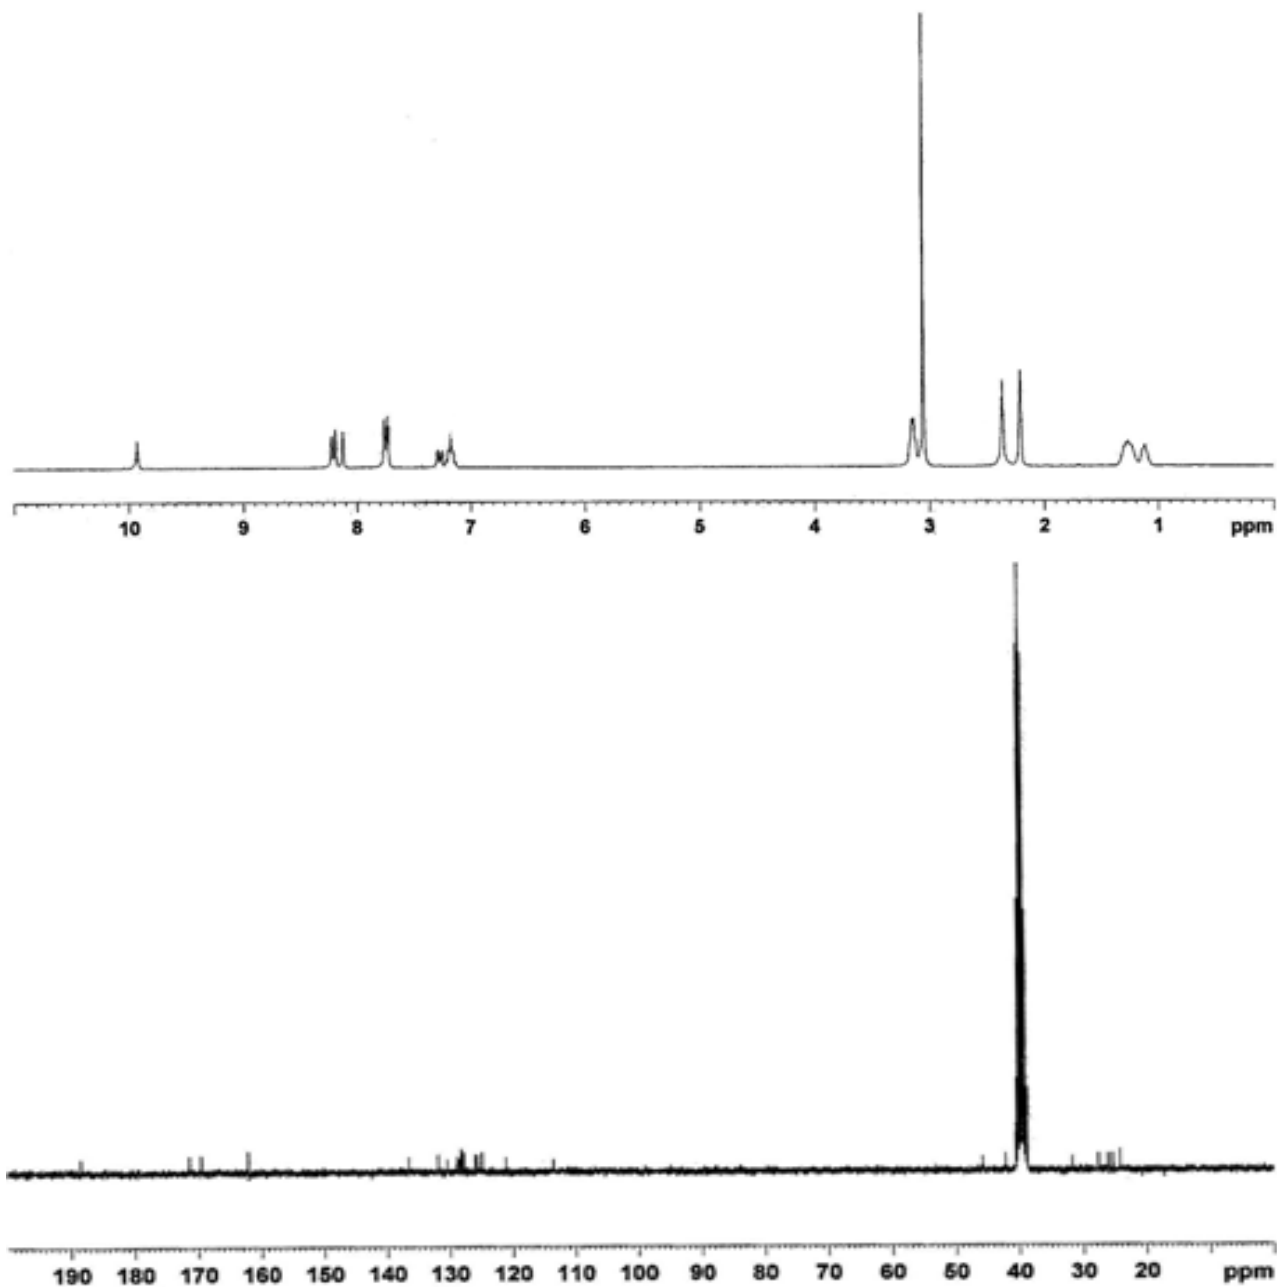

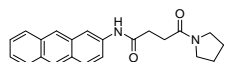

Compound **3pl**

$^1\text{H}$  NMR and  $^{13}\text{C}$  NMR ( $\text{CDCl}_3$ )

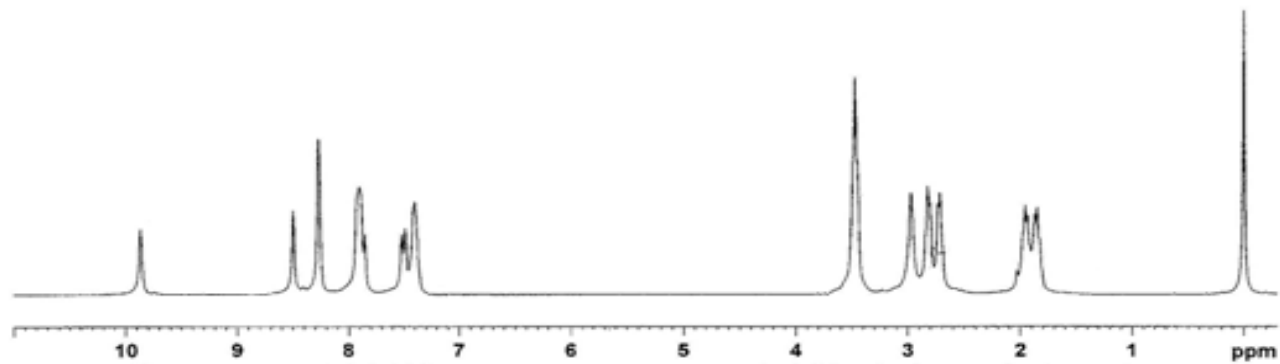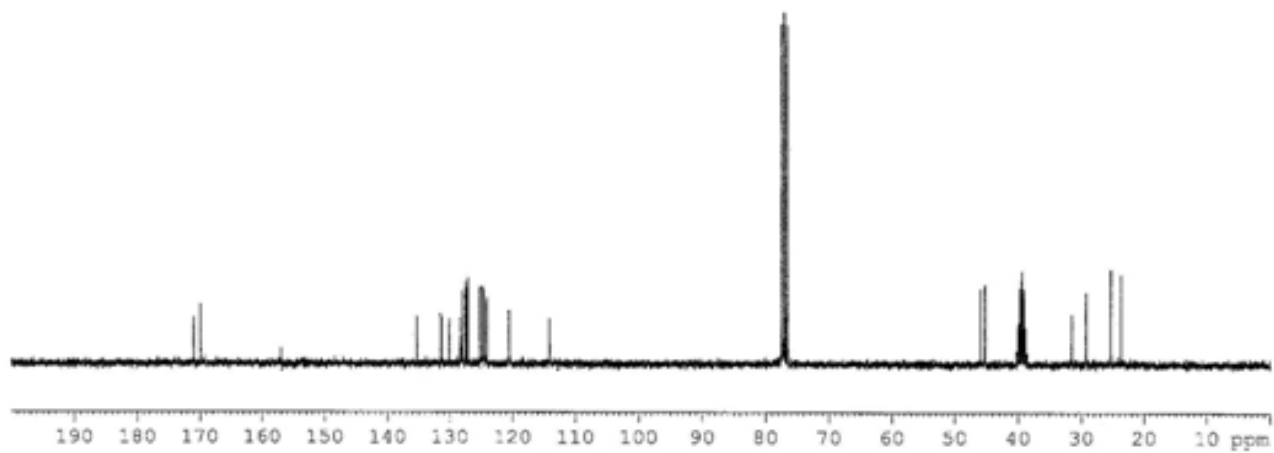



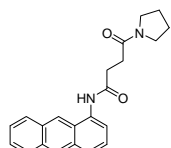

Compound **3po**

$^1\text{H}$  NMR ( $\text{CDCl}_3$ ) and  $^{13}\text{C}$  NMR ( $\text{DMSO-}d_6$ )

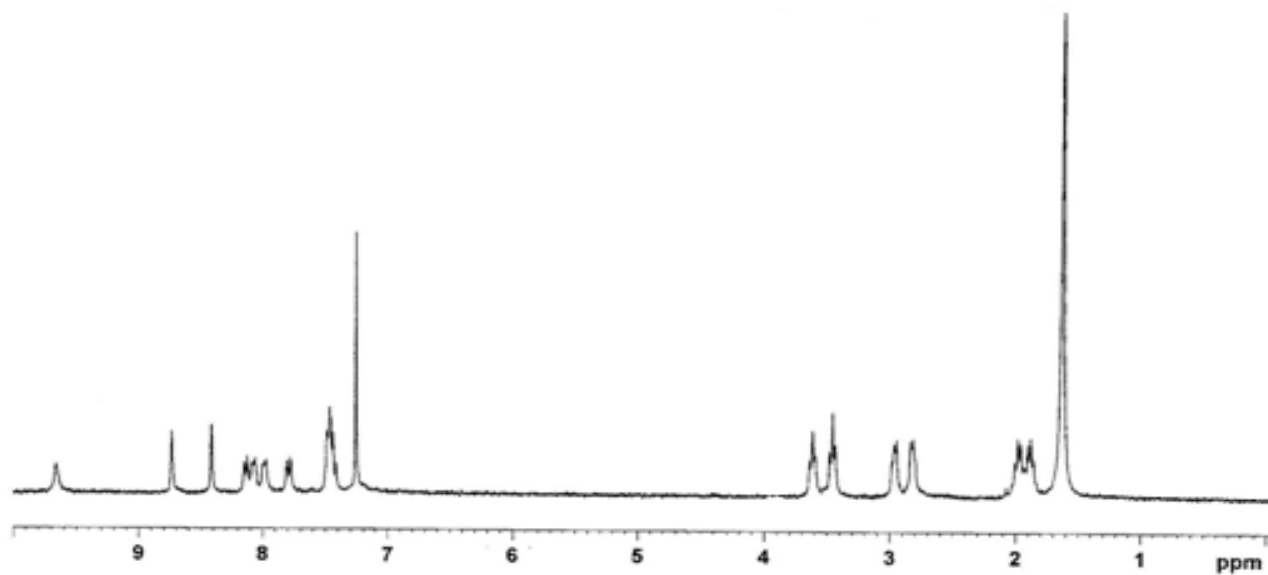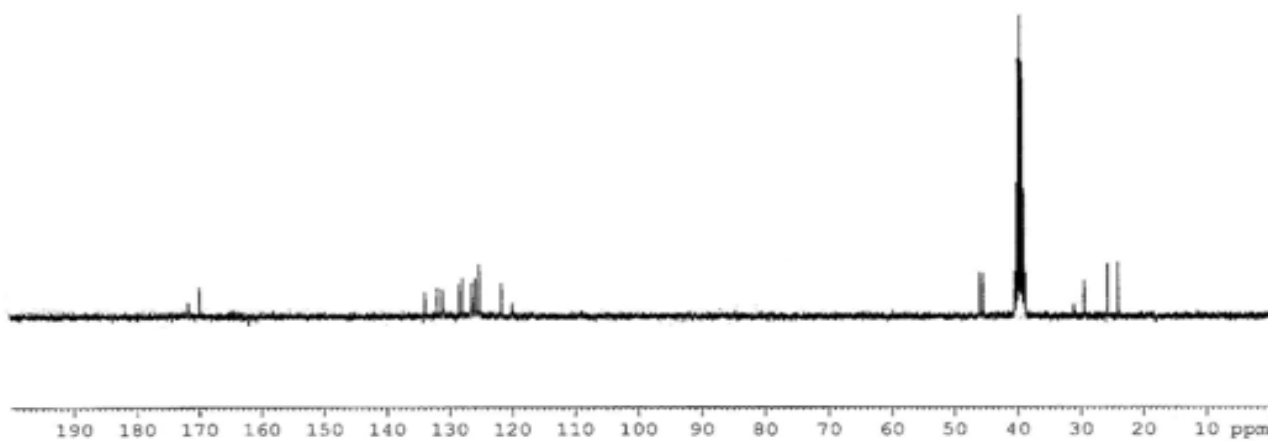

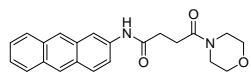

Compound **3ql**

$^1\text{H}$  NMR and  $^{13}\text{C}$  NMR ( $\text{DMSO-}d_6$ )

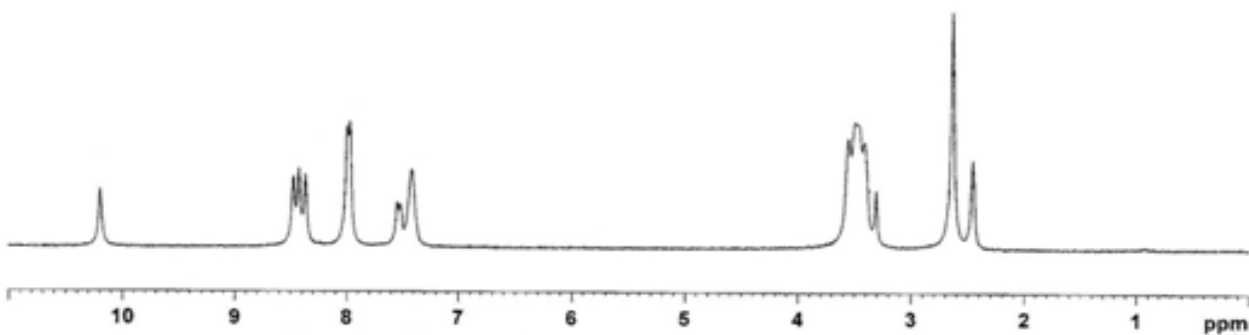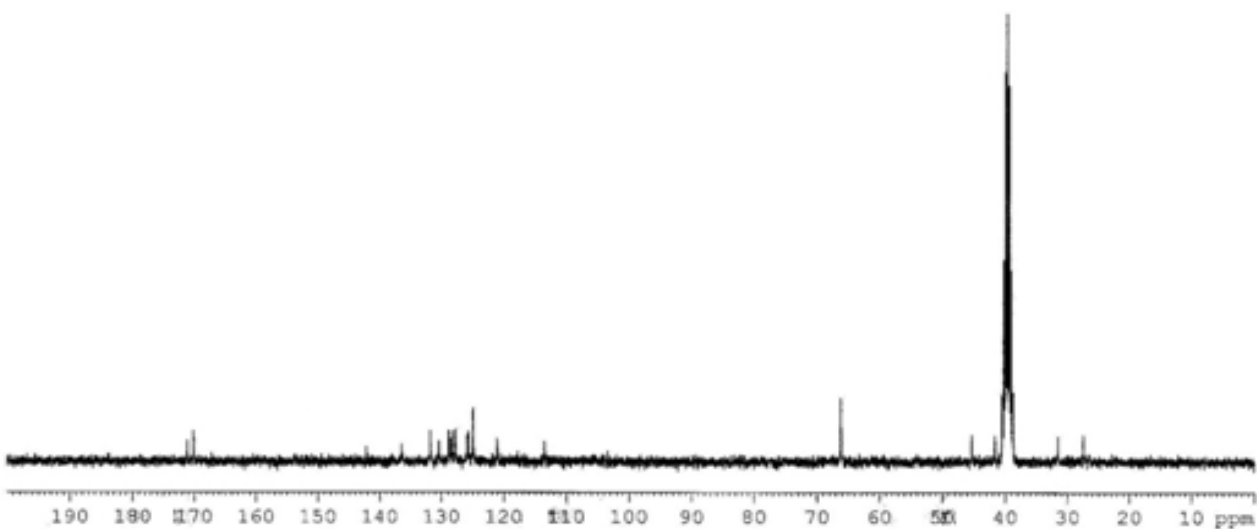

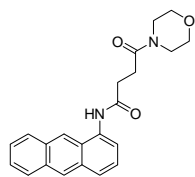

Compound **3qo**

<sup>1</sup>H NMR and <sup>13</sup>C NMR (CDCl<sub>3</sub>)

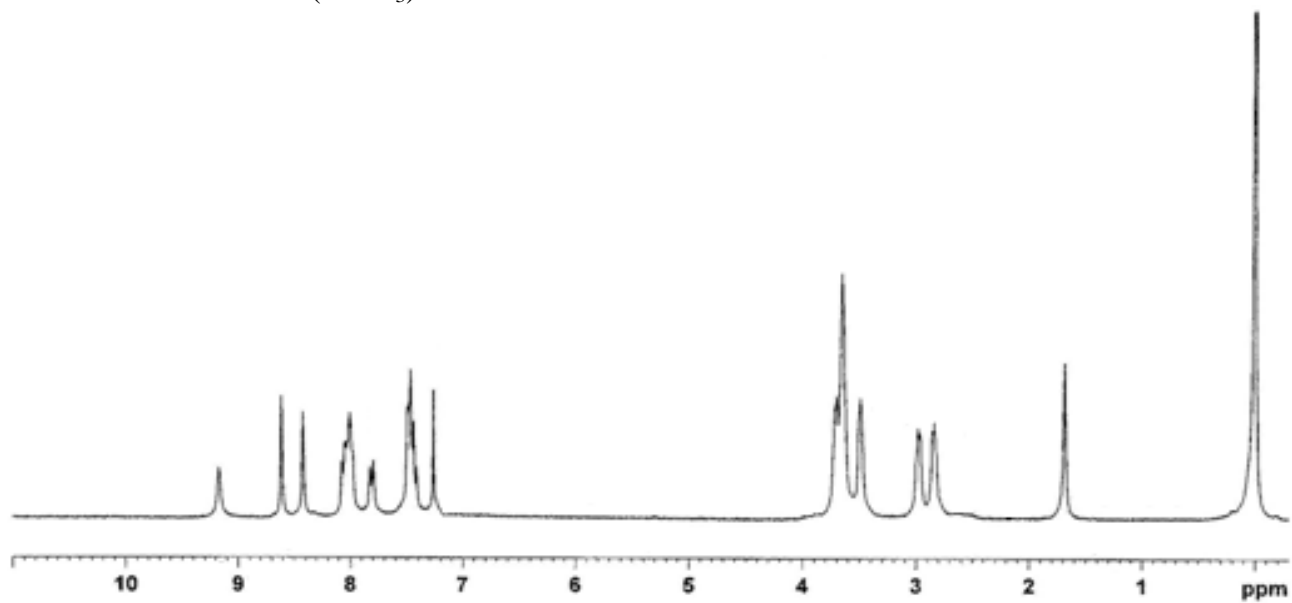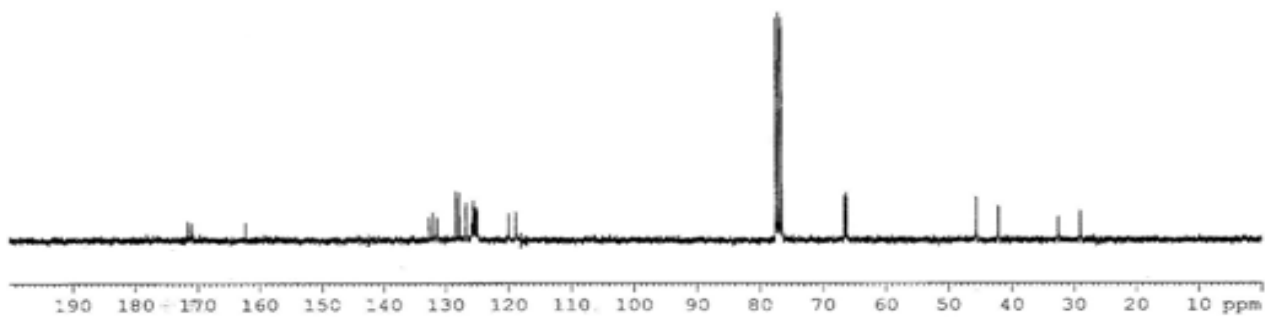

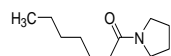

Compound **3ir**

$^1\text{H}$  NMR and  $^{13}\text{C}$  NMR ( $\text{CDCl}_3$ )

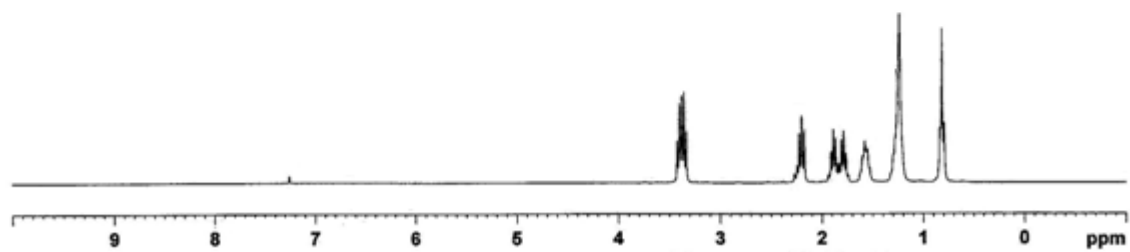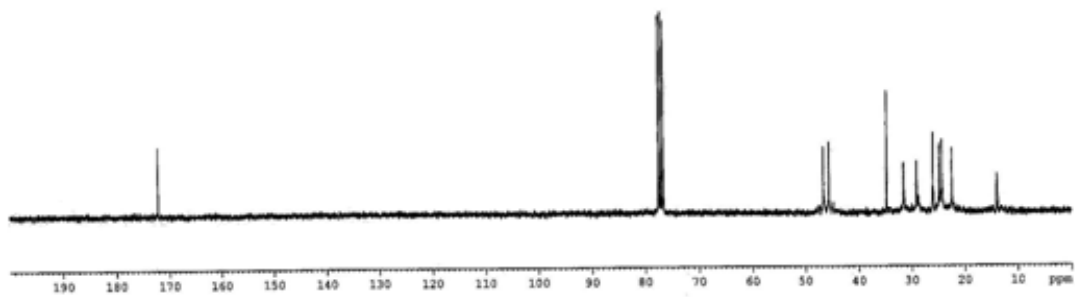

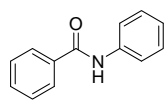

Compound **3sm**

$^1\text{H}$  NMR and  $^{13}\text{C}$  NMR ( $\text{CDCl}_3$ )

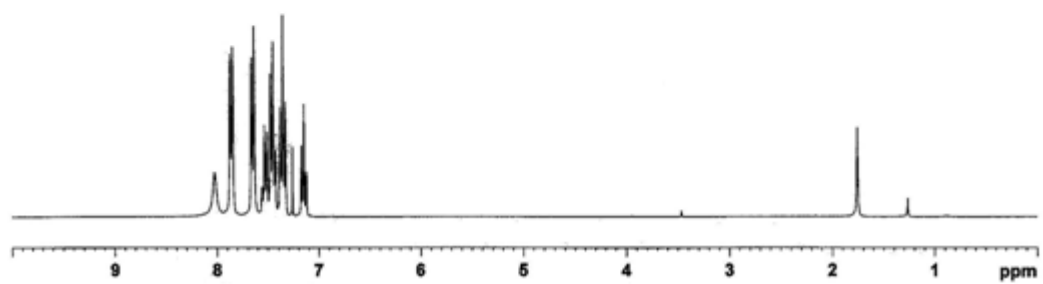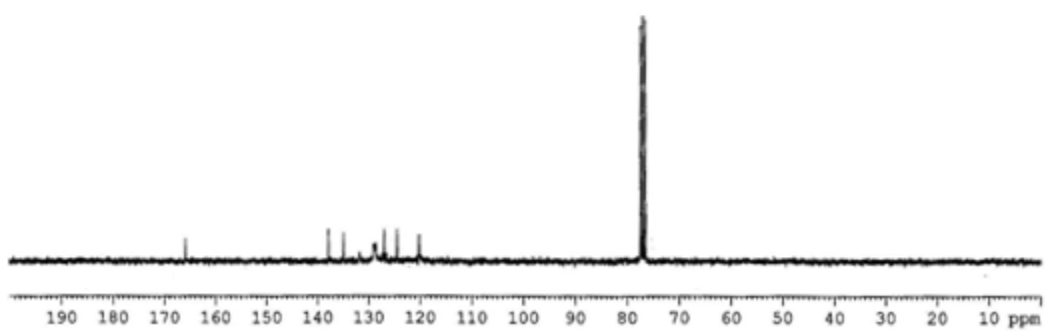

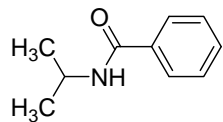

Compound 3st

$^1\text{H}$  NMR and  $^{13}\text{C}$  NMR ( $\text{CDCl}_3$ )

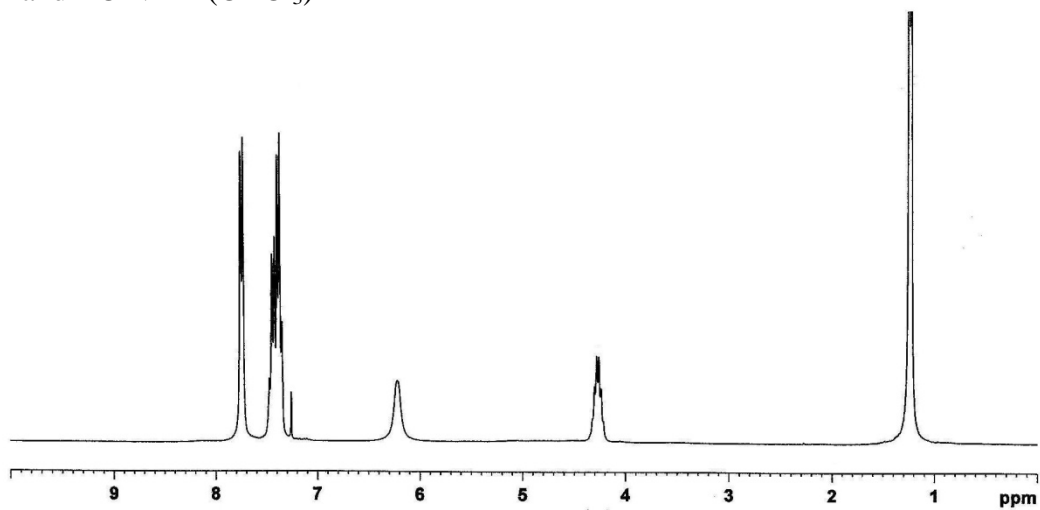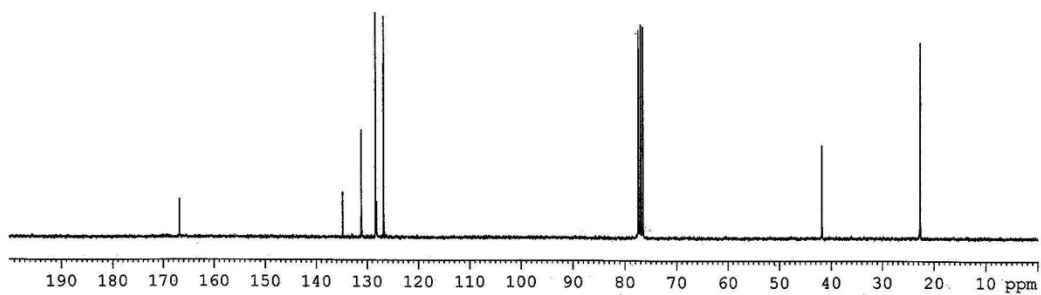

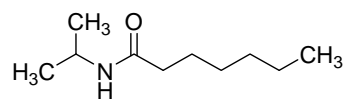

Compound **3it**  
 $^1\text{H}$  NMR and  $^{13}\text{C}$  NMR ( $\text{CDCl}_3$ )

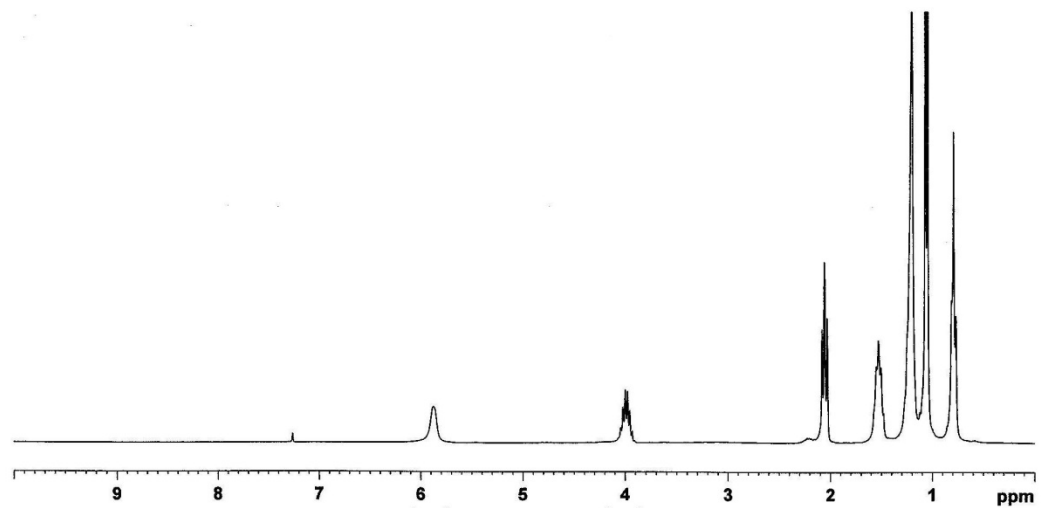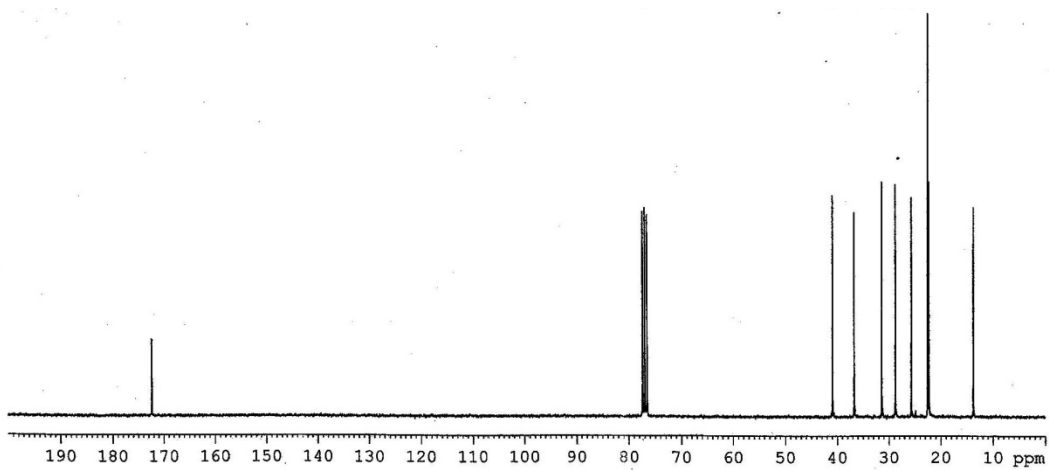

Supplement: c2gc35880h_2.pdf [file c2gc35880h_2.pdf]
